# Supplementary material for: Efficacy and Survival Analysis of Long-term Temozolomide Chemotherapy for Glioblastoma
Source: Research Square preprint supplement (doi:10.21203/rs.3.rs-7914006/v1), 2025-12-02
Supplement: Supplementary file 1 [file cdf38dfd4da553fe726bec5e.xlsx]

## Sheet: Primary data
No.	PFS (m)	OS (m)	Relapse	Alive	Treatment cycles > 6	IDHmut	Brain lobes > 1	MGMTmet	Age >= 55	Size of tumor >6cm	Pre surgery KPS	TERTmut	Sex (male)	Gastrointestinal reaction	Thrombocytopenia	Neutropenia	Anemia
1	19.8	38.8	1	0	1		0	0	1	1	0		1	1	0	0	0
2	34.8	34.8	0	0	1	1	0	1	0	1	0	0	1	0	1	1	0
3	25.2	26	1	0	1	0	0	0	1	0	0	0	0	1	0	0	1
4	29.4	29.4	0	0	1		0	0	1	1	1		1	1	0	0	0
5	26.5	26.5	0	0	1	0	0	1	1	1	0	1	0	0	1	1	0
6	30	32.2	1	0	1	1	0	1	0	0	1	0	1	1	0	0	1
7	28.7	28.7	0	0	1	1	0	1	1	0	0	0	1	1	0	0	0
8	27.3	27.3	0	0	1	0	0	1	1	0	0	1	0	1	0	0	0
9	20.3	20.3	0	0	1	1	0	1	0	1	0		0	1	1	1	0
10	20.2	20.2	0	0	1	0	0	1	0	1	1	1	0	0	0	0	0
11	16.8	19.1	1	1	1	0	1	1	1	1	0	1	0	0	1	0	0
12	16.8	16.8	0	1	1	0	0	1	0	1	1	1	0	1	0	0	1
13	16.5	21.7	1	1	1	0	0	1	1	0	0	1	0	0	1	0	0
14	18.7	18.7	1	0	1	0	0	1	0	0	1	1	1	1	0	0	0
15	17	17	0	0	1	1	0	0	1	0	0	1	1	0	1	0	0
16	16.8	21.2	1	1	1	0	0	0	0	1	0	0	0	0	0	1	0
17	33.2	50	1	1	1	0	0	1	0	0	0	0	1	1	0	0	0
18	16.8	34.3	1	0	1	0	0	1	1	0	1	1	0	0	0	0	0
19	18.5	18.5	0	0	1	0	0	1	1	0	0	0	1	0	0	0	0
20	13.7	23.6	1	1	1	0	0	1	0	0	0	1	0	1	0	0	0
21	35.1	37.6	1	1	1	0	1	1	1	0	0	1	0	0	0	0	1
22	40.1	40.1	0	0	1	1	0	1	1	0	0	0	0	0	0	0	0
23	23.9	25.7	1	0	1	0	1	1	1	0	0	1	1	1	0	0	0
24	13.1	19.7	1	1	1	0	0	1	1	1	1	1	1	0	1	0	0
25	15.6	18.6	1	1	1	0	0	1	1	1	0	1	1	1	0	0	0
26	1.5	20.5	1	1	1	0	1	0	0	1	0		1	1	0	1	0
27	17	17	0	0	1	0	0	0	1	0	1	0	1	0	0	1	0
28	16.8	16.8	0	0	1	1	0	1	1	0	1	0	0	0	0	0	0
29	9.9	17.9	1	1	1	0	0	1	1	1	0	1	0	1	0	0	1
30	9.9	17.4	1	1	1	0	0	0	1	1	1	0	1	1	1	0	0
31	21.3	39.2	1	0	1	0	0	0	0	1	0	1	1	0	0	0	0
32	14.9	28.1	1	1	1	0	1	0	1	0	0	1	1	1	0	0	0
33	11.3	13.3	1	1	1	0	1	1	1	0	0	1	1	0	0	1	0
34	14.7	22.1	1	0	0	0	0	1	1	0	1	1	0	1	0	0	0
35	10.9	15.1	1	1	0	0	1	0	0	0	0		1	0	0	0	0
36	15.7	25.1	1	0	0	0	1	1	0	1	0	1	1	1	1	0	0
37	18.7	23.8	1	1	0	0	0	1	0	0	0	0	0	1	0	1	0
38	12.5	14.8	1	1	0	0	0	0	1	1	1		1	1	0	0	0
39	8.7	15.6	1	1	0	1	0	0	0	0	0		0	0	0	1	0
40	9	19.5	1	1	0	0	0	0	1	0	0	0	1	0	0	0	0
41	2	8.6	1	1	0	0	1	0	0	0	0	1	1	1	1	0	0
42	9.1	35.2	1	0	0	0	1	1	1	0	0	1	1	0	0	0	0
43	38.6	38.6	0	0	0	0	0	1	0	1	0		1	1	0	0	0
44	32.6	37.6	1	0	0		0	0	1	0	0		0	1	0	0	1
45	11.9	19.2	1	1	0	0	0	0	1	0	0	1	1	0	1	1	0
46	5.8	26.7	1	1	0	1	1	1	1	0	0		1	1	0	0	0
47	18	25.9	1	1	0	0	0	1	1	1	0		1	0	0	0	0
48	8	14.6	1	1	0	0	1	0	1	0	0	0	1	1	0	0	0
49	10.3	12.6	1	1	0	0	1	0	0	0	0	1	0	0	1	1	1
50	15.6	15.6	1	1	0		1	0	1	1	0		1	1	0	0	0
51	16.4	16.4	0	0	0	0	0	1	1	0	0	1	0	0	0	0	0
52	17.6	17.6	0	0	0	0	0	1	1	1	0		1	1	0	0	0
53	18.7	19.6	1	0	0	0	0	0	0	0	1	1	0	1	0	0	0
54	9.3	13.4	1	1	0	0	0	0	1	0	0	0	0	0	0	0	0
55	9.8	18	1	1	0	0	0	1	0	0	0	1	1	1	0	1	0
56	15.8	17.8	1	1	0	0	0	0	0	0	0	1	1	1	0	0	0
57	21.8	23.4	1	1	0	0	0	0	0	0	0	1	0	0	0	0	0
58	5.2	10.1	1	1	0	1	0	1	1	1	0	1	0	0	1	0	1
59	36	36.7	1	0	0		1	0	0	0	0		1	1	0	0	0
60	23.5	38.6	1	1	0	0	0	1	1	0	0	0	1	1	0	1	0
61	5.9	10.3	1	1	0		0	1	0	0	0		1	0	0	0	0
62	17.4	17.4	0	0	0	0	1	0	1	0	0	0	0	0	0	0	0
63	8.8	17	1	1	0	0	1	0	0	1	0		1	1	0	0	0
64	6.8	10.6	1	1	0	0	0	1	1	0	0	1	1	1	0	0	0
65	6.1	8.5	1	1	0	0	0	0	1	0	0	0	1	1	0	0	0
66	7.5	11.7	1	1	0	0	0	0	1	1	0	0	0	0	0	1	0
67	6.9	13	1	1	0		0	1	1	0	0		0	1	0	1	0
68	9.8	14.3	1	1	0	0	0	0	0	1	0	1	0	1	0	0	0
69	5.9	9	1	1	0		1	0	0	0	1		1	1	0	0	0

## Sheet: Annotation
	Yes	No
Rsplase	1	0
Alive	1	0
Treatment cycles > 6	1	0
IDHmut	1	0
Brain lobes > 1	1	0
MGMTmet	1	0
Age >= 55	1	0
Size of tumor >6cm	1	0
Pre surgery KPS <80	1	0
TERTmut	1	0
Sex (male)	1	0
Gastrointestinal reaction	1	0
Thrombocytopenia	1	0
Neutropenia	1	0
Anemia	1	0
